# Supplementary material
Source: publisher figshare collection journal article supplement (https://sage.figshare.com/ndownloader/files/15017306)
Supplement: Supplementary file 1 [file 15017306]

# Appendix 1

## Method

### Eligibility criteria

No limit placed on type of study or participants.

### Information sources

Medline, Embase and PsycINFO electronic databases searched via the Ovid search platform. Searches limited to English publications between 2000 and 2017. A PreMedline search was performed to identify unindexed, recent English articles from January 2016 to April 2017. An additional search for grey literature was performed.

### Search

The following search terms were used: at least one of the five following disorders- DDS; disruptive, impulse control, and conduct disorders; hedonistic homeostatic dysregulation; factitious disorders and levodopa addiction was combined with the presence of one of the four following factors - antiparkinson agents; dopamine agents; levodopa or non-Parkinson. We included levodopa addiction so that DDS in non-PD patients were captured. An example of the search strategy used for Medline is included below.

1 Dopamine Dysregulation Syndrome.mp.

2 "Disruptive, Impulse Control, and Conduct Disorders"/

3 hedonistic homeostatic dysregulation.mp.

4 Factitious Disorders/

5 levodopa addiction.mp.

6 1 or 2 or 3 or 4 or 5

7 Antiparkinson Agents/ae, tu [Adverse Effects, Therapeutic Use]

8 Dopamine Agents/ae [Adverse Effects]

9 Levodopa/ae, tu [Adverse Effects, Therapeutic Use]

10 non-parkinson\*.mp.

11 7 or 8 or 9 or 10

12 6 and 11

13 limit 12 to (English language and yr="2000 -Current")

The Premedline search was a keyword search and the terms used were dopamine dysregulation or impulse control combined with Parkinson.

Relevant references from pertinent articles were included and abstracts sought.

### Study selection

One of the authors reviewed all titles and abstracts. The full text publications were reviewed based on relevance to the psychiatric population in question.
